# Supplementary material for: Modified ELISA for Ultrasensitive Diagnosis
Source: MDPI journal article supplement (doi:10.3390/jcm10215197), 2021-11-07
Supplement: s1 [file s1]

**Table S1.** List of modified ELISAs. The ELISA principles, analytes, detection sensitivity, and reference numbers are shown.

| Category                                                                               | Principle                                                                                                    | Analyte                                                              | Detection sensitivity                                                                                    | Reference # |
|----------------------------------------------------------------------------------------|--------------------------------------------------------------------------------------------------------------|----------------------------------------------------------------------|----------------------------------------------------------------------------------------------------------|-------------|
| Digital ELISA                                                                          | Fluorescence imaging for beads in femtoliter well arrays                                                     | PSA                                                                  | 14 fg/mL                                                                                                 | 33          |
| Digital ELISA                                                                          | Fluorescence imaging for beads in femtoliter well arrays                                                     | Recombinant nucleoprotein for influenza A virus                      | 4 ± 1 fM (in buffer), 10 ± 2 fM (in 10-fold diluted nasopharyngeal swabs)                                | 34          |
| Digital ELISA                                                                          | Bifunctional fluorescence magnetic nanospheres with AuNPs                                                    | H7N9 avian influenza virus                                           | 7.8 fg/mL                                                                                                | 35          |
| Digital HoNon-ELISA                                                                    | Wash- and amplification-free digital immunoassay method                                                      | PSA                                                                  | 0.093 pg/mL                                                                                              | 36          |
| dSimoa                                                                                 | Dropcast single molecule assay                                                                               | IL-10, IL-1β                                                         | 19.2 aM (IL-10), 99.6 aM (IL-1β)                                                                         | 37          |
| Digital ELISA viral outgrowth or DEVO assay                                            | Digital ELISA combined with a quantitative viral outgrowth assay                                             | HIV-1 p24                                                            | 12 fg/mL                                                                                                 | 38          |
| Digital ELISA                                                                          | Magnetic bead-encoding technology                                                                            | Spike and nucleocapsid proteins of SARS-CoV-2                        | 20.6 fg/mL (spike protein), 69.8 fg/mL (nucleocapsid protein)                                            | 39          |
| Invader assisted ELISA assay                                                           | Sandwich ELISA with DNA signal amplification                                                                 | Recombinant HBV                                                      | 2.4 × 10 <sup>-11</sup> g/mL (naked eye)                                                                 | 41          |
| AuNP-based plasmonic sensors for ELISA                                                 | AuNP and plasmonic sensor                                                                                    | H7N9 avian influenza virus                                           | 25 pg/mL (naked eye)                                                                                     | 42          |
| Fluorescence enzyme-linked immuno-sorbent assay                                        | Rhodamine, whose fluorescence was extinguished, as the substrate for HAT                                     | α-Fetoprotein, hepatitis B virus surface antigen                     | 10 <sup>-8</sup> ng/mL and 5 × 10 <sup>-4</sup> IU/mL                                                    | 43          |
| Plasmonic enzyme-linked immuno-sorbent assay                                           | Plasmonic ELISA and biocatalytic cycle of intracellular enzymes to lead growth of AuNPs                      | Mycobacterium tuberculosis ESAT-6-like protein esxB (CFP-10)         | 0.01 µg/mL (naked eye)                                                                                   | 44          |
| ELISA with AuNP-PAMAM probe                                                            | Assemble of AuNPs induced by functional PAMAM                                                                | hCG                                                                  | 0.03 IU/L                                                                                                | 45          |
| AuNP-based ELISA                                                                       | AuNP as a bridge between the detection antibody and HRP                                                      | Nucleocapsid protein of SFTSV                                        | 0.9 pg/mL                                                                                                | 46          |
| ELISA combining MNC and AuNP probe                                                     | MNCs facilitating liquid mixing and mass transfer; AuNPs co-immobilizing HRP and detection antibodies        | Myoglobin (Mb), creatine kinase-MB (CK-MB), C-reactive protein (CRP) | 147 pg/mL (Mb), 126 pg/mL (CK-MB), 53 pg/mL (CRP)                                                        | 47          |
| AgNPs with AA reducing Ag <sup>+</sup> promoted by prereduction with NaBH <sub>4</sub> | AA-mediated enhanced growth of AgNPs promoted by NaBH <sub>4</sub> as pre-reducing agent                     | ALP, carbohydrate antigen 125                                        | 0.003 U/L (ALP), 1.75 U/mL (carbohydrate antigen 125)                                                    | 48          |
| Enhanced colorimetric detection using in-situ growth of Ag shell on AuNPs              | Enhanced colorimetric immunoassay for NoV detection for catalytic activity using in-situ growth of Au/Ag NPs | NoV-LP, NoV GII.4 and NoV GII.3 in fecal solution                    | 10.8 pg/mL (NoV-LPs), 10 <sup>2</sup> - 10 <sup>6</sup> copies of viral RNA/mL (NoV GII.4 and NoV GII.3) | 49          |
| Chemi-luminescence ELISA                                                               | Chemiluminescence substrate                                                                                  | Aβ <sub>42</sub>                                                     | 1 pg/mL                                                                                                  | 50          |
| Sandwich ELISA with PIFA                                                               | Photooxidation-induced fluorescence amplification                                                            | Aβ <sub>42</sub>                                                     | enhanced the detection sensitivity by more than a factor of 10, few pg/mL                                | 51          |
| ECL-ELISA                                                                              | High-performance ECL-ELISA with high-quantum-yield AuNC probe                                                | TNF-α                                                                | 36 fg/mL                                                                                                 | 52          |
| Time-resolved fluoro-immuno-assay (TRFIA)                                              | Fluoroimmunoassay using Eu <sup>3+</sup>                                                                     | Saikosaponin a (SSa)                                                 | 0.006 µg/mL                                                                                              | 53          |
| Time-resolved fluoro-immuno-assay (TRFIA)                                              | Time-resolved fluoroimmunoassay using Eu <sup>3+</sup> -labelled IgG as a tracer                             | Aflatoxin B1 (AFB1)                                                  | 3.55 pg/mL                                                                                               | 54          |
| ICT-EIA for GADA                                                                       | Immune complex enzyme activity                                                                               | Human glutamic acid decarboxylase 65 in serum                        | 0.1 U/mL                                                                                                 | 55          |
| Pd-Ir NPs@GVs based ELISA                                                              | Enzyme-free signal amplification technique based on gold                                                     | PSA                                                                  | 31 fg/mL                                                                                                 | 56          |

|                                                                                                  |                                                                                                                                                                                          |                              |                                                           |    |
|--------------------------------------------------------------------------------------------------|------------------------------------------------------------------------------------------------------------------------------------------------------------------------------------------|------------------------------|-----------------------------------------------------------|----|
|                                                                                                  | vesicles encapsulated with Pd-Ir nanoparticles as peroxidase mimics                                                                                                                      |                              |                                                           |    |
| HIF-PtCNC ELISA                                                                                  | HIF-Pt-CNC-labelled anti-PSA detection antibody as a signal probe                                                                                                                        | PSA                          | 0.8 pg/mL                                                 | 57 |
| Temperature-responsive liposomes                                                                 | Temperature-responsive liposomes containing SQR22 as a fluorescent detection probe                                                                                                       | PSA                          | 0.97 aM                                                   | 58 |
| DepID assay                                                                                      | Two nanobodies (Nbs) targeting two distinct epitopes of sCD38; one Nb acts as a capturer, and the other is fused with the firefly luciferase serving as a reporter to ensure sensitivity | Soluble CD38                 | 10 pg/mL                                                  | 59 |
| Improved ELISA using electro-readout-mode based on label triggered degradation of methylene blue | Electro-readout mode using a system based on CS@hemin triggered degradation of MB                                                                                                        | Cancer antigen 125 (CA125)   | 0.048 mU/mL                                               | 27 |
| HEHPA based ELISA                                                                                | Human serum albumin based nanoparticles capable of encapsulating excess HRP                                                                                                              | Thioredoxin-1 (Trx1)         | 10 fM                                                     | 26 |
| On chip optofluidic ELISA                                                                        | Polymer WGM microlaser-based optofluidic biochip for ELISA by printing high-quality polymer WGM microlaser sensors integrated into a microfluidic chip                                   | VEGF                         | 17.8 fg/mL                                                | 60 |
| DSHP                                                                                             | Ultrasensitive ELISA system based on HRP-loaded dendritic mesoporous silica nanoparticles (DMSN) modified with poly(amino acid) multilayers                                              | Mouse-IgG                    | 0.667 fM                                                  | 28 |
| Heterologous multiple-catalysis ELISA                                                            | Powerful and sensitive multiple-catalysis ELISA due to the enhanced catalytic activity and stability of Pt/IrO <sub>2</sub> @SA@HRP nanoflowers                                          | Progesterone (P4)            | 0.076 ng/mL                                               | 61 |
| RELISA                                                                                           | RELISA integrating RCA reaction and improved colorimetric reaction induced by enriched enzyme                                                                                            | CEACAM-7 antigen             | 2.82 pg/mL                                                | 62 |
| FA-MnO <sub>2</sub> /GO-based CELISA                                                             | Robust and sensitive sensing platform for the direct colorimetric detection of cancer cells based on a FA-MnO <sub>2</sub> /GO hybrid                                                    | Cancer cells                 | 20 HeLa cells (plate reader), 75 cancer cells (naked eye) | 63 |
| Real-time immuno-PCR assay                                                                       | Combination of highly sensitive immuno-PCR, employing standardized self-assembled DNA-protein conjugates as reagents, and the real-time PCR detection by means of the TaqMan principle   | rViscumin, research antibody | 40 pg/mL (rViscumin), 100 pg/mL (research antibody)       | 65 |
